# Supplementary figures and images for: Functional analysis of the zinc finger and activation domains of Glis3 and mutant Glis3(NDH1)
Source: PubMed Central journal article supplement — Nucleic Acids Res. 2008 Feb 7;36(5):1690–702. doi: 10.1093/nar/gkn009 (PMC2275160; doi:10.1093/nar/gkn009), 2008-02-07

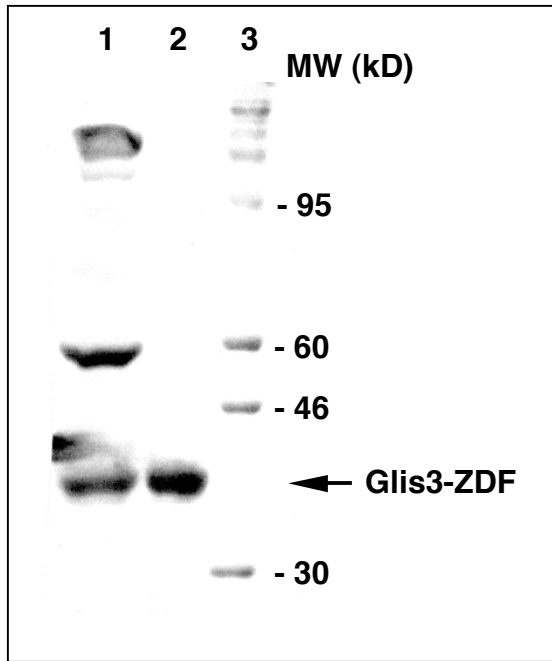

**Fig. 1S**

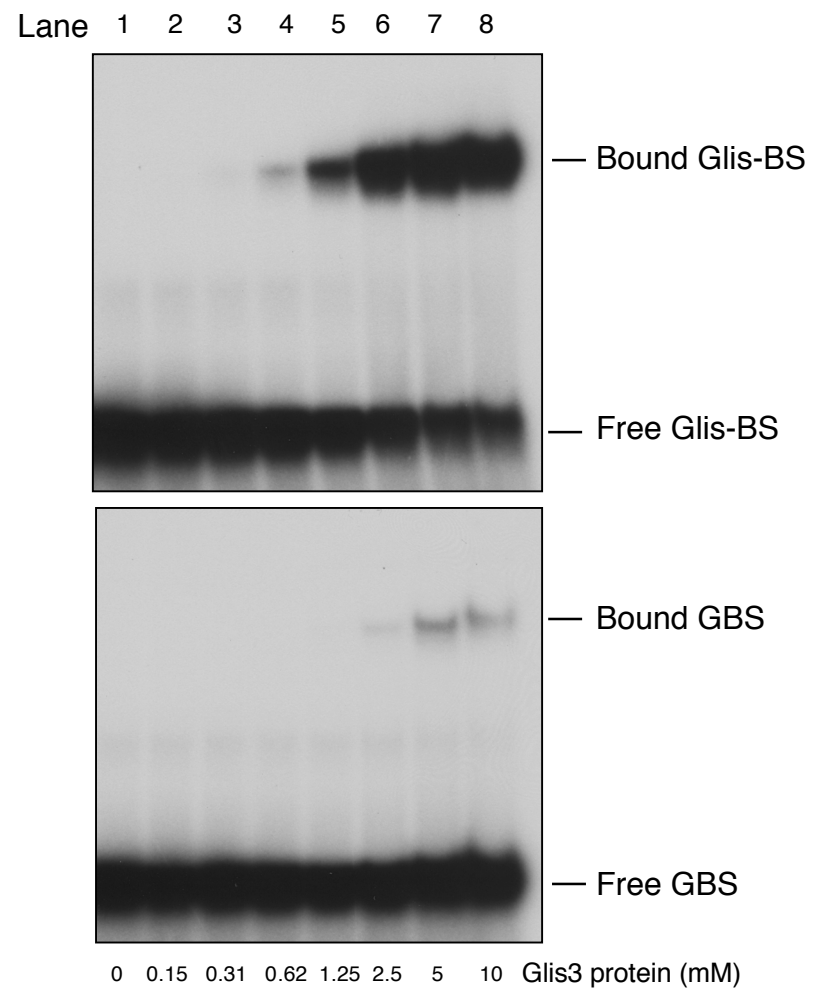

**Fig. 2S**

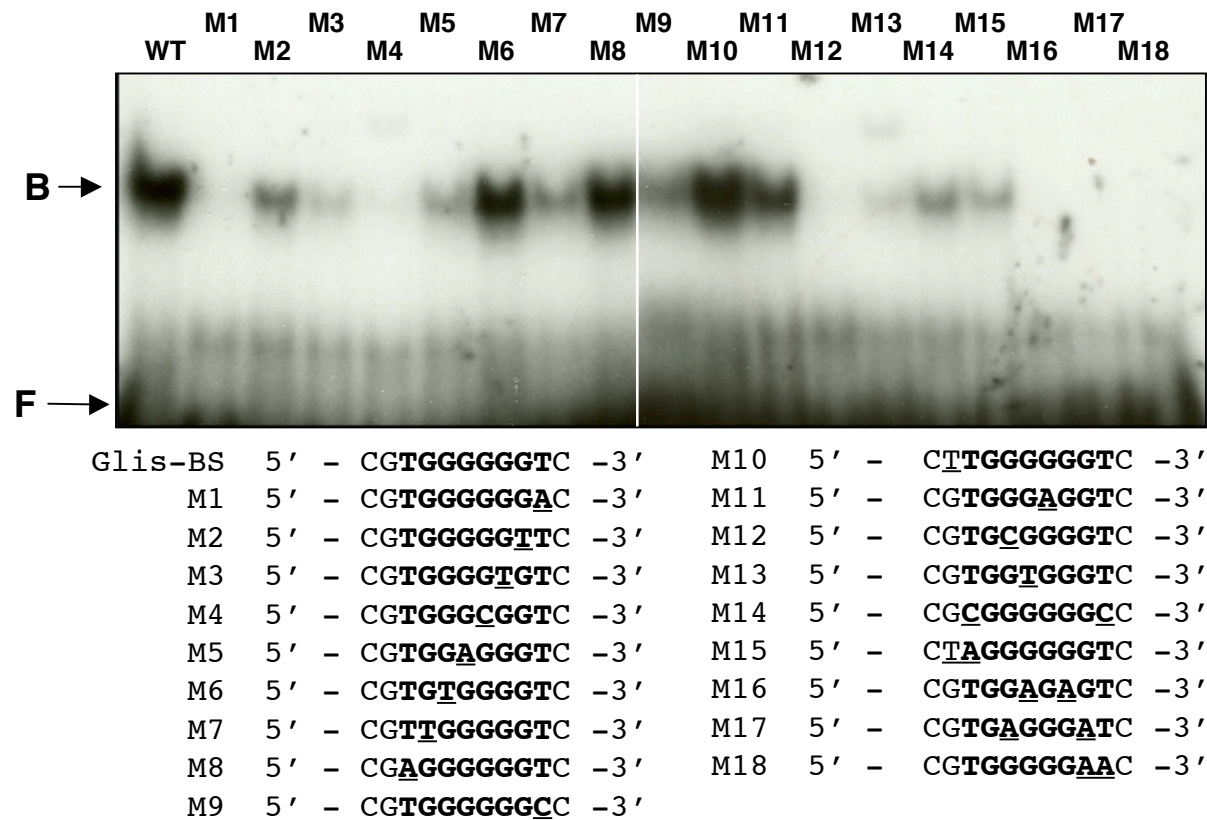

Fig. 3S

Supplement: nar_gkn009_1.pdf [file nar_gkn009_1.pdf]
